# Supplementary material for: Dietary polyphenols maintain homeostasis via regulating bile acid metabolism: a review of possible mechanisms
Source: Royal Society of Chemistry journal article supplement (doi:10.1039/d3fo02471g), 2023-01-01
Supplement: d3fo02471g2.pdf [file d3fo02471g2.pdf]

Supplemental table

Table S1. Dietary polyphenols activate/inhibit liver and intestinal FXR and TGR5

| Source of polyphenols    | Dose             | Model                                                                         | time     | With receptor action form | Metabolic or Functional Effects                                                             | Refs |
|--------------------------|------------------|-------------------------------------------------------------------------------|----------|---------------------------|---------------------------------------------------------------------------------------------|------|
| Apple Polyphenol Extract | 0.5% of the diet | Male Sprague-Dawley strain rats fed AIN-93G diets containing 0.5% cholesterol | 30 days  | FXR agonism               | CYP8B1, HNF-3 $\beta$ , HNF-6 $\uparrow$ ;<br>CYP7A1 $\downarrow$                           | 105  |
| Aspirin eugenolester     | 27 mg/kg         | Male Syrian golden hamsters fed a high-fat diet                               | 12 weeks | FXR inhibition            | CYP7A1, CYP8B1, ApoCA, G-BA $\uparrow$ ; IsoLCA, T-BA, LysoPC $\downarrow$                  | 106  |
|                          | 150 mg/kg        | Male C57BL/6 mice fed a high-fat diet                                         | 12 weeks | Intestinal FXR inhibition | CYP7A1, PGC-1 $\alpha$ , PPAR $\alpha$ $\uparrow$ ;<br>FGF 15 $\downarrow$                  | 107  |
| Chlorogenic Acid         | 20/50/100 mg/kg  | Male Wistar rats underwent bile duct ligation (BDL)                           | 3/7 days | FXR inhibition            | Bsep, Mrp 2/3/4 $\uparrow$ ; Ntcp, Oatp 1a4, Oatp 1b2, ALT, AST, TBIL, and TBA $\downarrow$ | 108  |
| Curcumin                 | 50/100 mg/kg     | Male C57BL/6 mice fed a high-fat and high-fructose diet                       | 12 weeks | FXR agonism               | SREBP-1c, FAS, LXR $\alpha$ $\downarrow$ ; Nrf2, FXR, SHP, CYP3A, CYP7A1 $\uparrow$         | 109  |
| Corn silk extract        | 100 mg/kg        | Male C57BL/6 mice fed a high-fat diet                                         | 8 weeks  | FXR inhibition            | adipocytokines $\uparrow$ ; HMG-CoA, ACAT $\downarrow$                                      | 110  |

|                                                              |                  |                                                                                                     |          |                |                                                                                                                                                                                                            |     |
|--------------------------------------------------------------|------------------|-----------------------------------------------------------------------------------------------------|----------|----------------|------------------------------------------------------------------------------------------------------------------------------------------------------------------------------------------------------------|-----|
| Carob pod ( <i>Ceratonia siliqua</i> L.) rich in polyphenols | 3% of the diet   | Male New Zealand rabbits fed dyslipidemic diet supplemented with 0.5% cholesterol + 14% coconut oil | 8 weeks  | FXR inhibition | HMG-CoA reductase, CYP7A1, LDL, SIRT1, PGC-1 $\alpha$ $\uparrow$ ; hepatic lipase, glycerol phosphate acyltransferase, SREBP1c $\downarrow$                                                                | 111 |
| <i>Canarium album</i> L. ethanol Extract                     | 760 mg/kg        | Male Sprague-Dawley adult rats fed a high-fat diet, T2D is induced with STZ                         | 8 weeks  | FXR agonism    | GLUT2, GK $\uparrow$ ; PEPCK, G6Pase, SREBP-2, HMG-CoAR, SR-B1, CYP7A1, BSEP, MRP3, MRP4, NTCP, LDLR, ABCG8, FXR, SHP, TC, TNF- $\alpha$ $\downarrow$                                                      | 112 |
| Diosgenin                                                    | 150/300 mg/kg    | Male Sprague-Dawley rats fed a high-fat diet                                                        | 12 weeks | FXR agonism    | SRB1, CES-1, CYP7A1 $\uparrow$                                                                                                                                                                             | 113 |
| Ecklonia cava                                                | 300 mg/kg        | Male C57BL/6 mice fed a high-fat diet                                                               | 10 weeks | FXR inhibition | CYP7A1, SIRT1 $\uparrow$ ; TNF- $\alpha$ , IL-1 $\beta$ , MCP-1, SREBP-1c, FAS, FXR, SHP $\downarrow$                                                                                                      | 114 |
| Enzymatically modified isoquercitrin                         | 0.1% of the diet | Male C57BL/6 mice fed a high-fat diet                                                               | 2 weeks  | FXR agonism    | (PPAR) $\gamma$ , SREBP1, (C/EBP) $\alpha$ , C/EBP $\beta$ , sterol regulatory element-binding protein 1 $\downarrow$ ; uncoupling protein (UCP) 2, carnitine palmitoyltransferase-1, sirtuin 1 $\uparrow$ | 115 |

|                                                   |                  |                                                                                                                                                                                                                                       |          |                           |                                                                                                                           |     |
|---------------------------------------------------|------------------|---------------------------------------------------------------------------------------------------------------------------------------------------------------------------------------------------------------------------------------|----------|---------------------------|---------------------------------------------------------------------------------------------------------------------------|-----|
| Grape seed flour                                  | 10% of the diet  | Male C57BL/6J mice fed a high-fat diet                                                                                                                                                                                                | 9 weeks  | Intestinal FXR inhibition | <i>Lbp, Kcnj8, Wfdc21, Serpine1, Trem2, Trim30a, Nlrp3, VEGFR/MAPK, Mmp19, Angptl4</i><br>↓; <i>Adrb3, Sfrp5, Cers3</i> ↑ | 116 |
| Grape seed procyanidin extract                    | 250 mg/kg        | Male C57BL/6 mice                                                                                                                                                                                                                     | 14 hours | FXR agonism               | <i>Ppara</i> , phosphorylated protein, <i>Fgf21</i> ↑; HDAC2 and 3 ↓                                                      | 117 |
| Grape Seed proanthocyanidin                       | 250 mg/kg        | Male Wistar rats                                                                                                                                                                                                                      | 5 hours  | FXR agonism               | SHP, CYP7A1 ↑; TG, FFA, apoB48, apoAII, apoCI, apoCIII ↓                                                                  | 118 |
| Procyanidins                                      | 250 mg/kg        | FXR-deficient C57BL6 mice                                                                                                                                                                                                             | /        | FXR agonism               | SREBP1 ↓; ApoA5, SHP ↑                                                                                                    | 119 |
| <i>Inonotus obliquus</i>                          | 100 mg/kg        | C57BL/6J mice fed with the MCD diet, containing 0% methionine and 0% choline                                                                                                                                                          | 7 days   | FXR agonism               | FXR, SHP ↑; REBP-1c, ACC1, FASN ↓                                                                                         | 120 |
| Mirtoselect, an anthocyanin-rich bilberry extract | 0.1% of the diet | Female E3L mice were fed a Western-type diet (15% cocoa butter, 1% corn oil, 40.5% sucrose, 20% acid casein, 10% corn starch, and 6.2% cellulose; diet-T; AB-Diets, Woerden, The Netherlands), supplemented with 1% (w/w) cholesterol | 20 weeks | FXR agonism               | <i>Tnf, Emr1, Ccl2, Mpo, Cxcl1, Cxcl2, NF-κB</i> ↓                                                                        | 121 |
| Olive Leaf Extract                                | 3% of the diet   | Male Wistar rats fed a high-carbohydrate, high-fat diet                                                                                                                                                                               | 16 weeks | TGR5 agonism              | LDH, AST ↓                                                                                                                | 122 |

|                                                 |                         |                                                                       |          |                                                                                             |                                                                                                                                   |     |
|-------------------------------------------------|-------------------------|-----------------------------------------------------------------------|----------|---------------------------------------------------------------------------------------------|-----------------------------------------------------------------------------------------------------------------------------------|-----|
| Olive Leaf Extract                              | 0.1% of the diet        | Male C57BL/6J mice fed a high-fat diet                                | 10 weeks | TGR5 agonism                                                                                | PGC-1 $\alpha$ , Sirt1, brain-derived neurotrophic factor (BDNF), CS activity in the hippocampus $\uparrow$ ;<br>LPO $\downarrow$ | 123 |
| Oligonol ( from Lychee Fruit )                  | 1000 mg/kg              | Wistar rats                                                           | 3 days   | FXR inhibition                                                                              | CYP7A1 $\uparrow$                                                                                                                 | 124 |
| Oligomer Procyanidins from Lotus Seedpod        | 0.05/0.1/0.15g/kg       | Sprague Dawley (SD) rats fed a high-fat diet                          | 28 days  | FXR agonism                                                                                 | SREBP-1c, FAS, ACC1, PPAR $\gamma$ , CD36, ApoB, TG $\downarrow$ ; SHP, AMPK $\uparrow$                                           | 125 |
| Peanut skin-derived polyphenols                 | 300 mg/kg               | Male Wistar rats fed high-fat and high-cholesterol Western-style diet | 10 weeks | FXR agonism                                                                                 | FAS, (SREBP)-1c, ACC1, PPAR $\gamma$ $\downarrow$ ; PPAR $\alpha$ $\uparrow$                                                      | 126 |
| Procyanidins extracted from the litchi pericarp | 100 mg/kg               | apolipoprotein E knockout mice fed a high-fat diet                    | 24 weeks | FXR agonism                                                                                 | ABCA1, SHP, PPAR- $\alpha$ , LXR- $\alpha$ $\uparrow$ ;<br>HMG-CoA, SREBP-2 $\downarrow$                                          | 127 |
| Resveratrol                                     | 0.04/0.08 % of the diet | <i>M. amblycephala</i> juveniles fed a high-carbohydrate diet         | 12 weeks | <i>Fxr<math>\alpha</math></i> inhibition in the hindgut, <i>tgr5</i> agonism in the hindgut | T-SOD, CAT, GPX, Cu/Zn-sod, ldlr, Cyp7a1 $\uparrow$ ; hmgcr, acat2, mrp2, oatp1, oatp4 $\downarrow$                               | 128 |
| <i>Rhizoma Coptidis</i> alkaloids               | 140 mg/kg               | Male B6 mice fed a high-fat high cholesterol diet                     | 35 days  | FXR and TGR5 agonism                                                                        | SREBP2, LDLR, UCP2, CYP7A1 $\uparrow$ ; HMGCR, TXNIP, TLR4, JNK $\downarrow$                                                      | 129 |

|                                                         |                  |                           |        |             |                                                                                                                                      |     |
|---------------------------------------------------------|------------------|---------------------------|--------|-------------|--------------------------------------------------------------------------------------------------------------------------------------|-----|
| Total Flavonoids from <i>Rosa laevigata</i> Michx Fruit | 50/100/200 mg/kg | Male C57BL/6 mice fed LPS | 7 days | FXR agonism | Nrf2, HO-1, NQO1, GCLC,<br>GCLM, FOXO3a, CPT1 ↑;<br>Keap1, NF-κB, IL(IL)-1β, IL-6,<br>HMGB-1, COX-2, SREBP-1c,<br>ACc1, FASN, SCD1 ↓ | 130 |
|---------------------------------------------------------|------------------|---------------------------|--------|-------------|--------------------------------------------------------------------------------------------------------------------------------------|-----|

---
